# Supplementary material
Source: MDPI journal article supplement (https://www.mdpi.com/2075-163X/11/5/454)
Supplement: s1 [file s1]

# Supplementary Materials: EMP, XRD and Raman Characterization of Ag-bearing Djurleite from the Lubin Mine, Lower Silesia, Poland

Krzysztof Szopa \*, Tomasz Krzykawski, Kamila Banasik, Piotr Król, Sylwia Skreczko, Stefania Andriopoulou Mounteanou and Marta Koziarska

**Table S1.** Relevant parameters of djurleite (structure and profile data).

| Global Parameters                      |                                          |
|----------------------------------------|------------------------------------------|
| Profile function:                      | Pseudo Voigt                             |
| Background:                            | Polynomial                               |
| R (expected)/%:                        | 1.37608                                  |
| R (profile)/%:                         | 2.42522                                  |
| R (weighted profile)/%:                | 3.45941                                  |
| GOF:                                   | 6.31999                                  |
| R (Bragg)/%                            | 3.84969                                  |
| Relevant Parameters of Djurleite       |                                          |
| Formula sum                            | Cu <sub>248.00</sub> S <sub>128.00</sub> |
| Formula mass/g/mol                     | 19863.09                                 |
| Density (calculated)/g/cm <sup>3</sup> | 5.7712                                   |
| F(000)                                 | 9240.00                                  |
| Weight fraction/%                      | 100.00                                   |
| Space group (No.)                      | P 1 21/n 1 (14)                          |
| Lattice Parameters                     |                                          |
| a/Å                                    | 26.885(4)                                |
| b/Å                                    | 15.706(2)                                |
| c/Å                                    | 13.533(2)                                |
| alpha/°                                | 90                                       |
| beta/°                                 | 89.909(2)                                |
| gamma/°                                | 90                                       |
| V/10 <sup>6</sup> pm <sup>3</sup>      | 5715.7730                                |
| Fitting Mode (Structure Fit)           |                                          |
| U Left                                 | −0.06(3)                                 |
| V Left                                 | −0.01(3)                                 |
| W Left                                 | 0.031(7)                                 |
| Preferred orientation direction/hkl    | 0.00 0.00 1.00                           |
| Preferred orientation parameter        | 0.989989                                 |
| Peak Shape                             |                                          |
| parameter 1 Left                       | 1.0(1)                                   |
| parameter 2 Left                       | −0.006(3)                                |
| parameter 3 Left                       | 0.000000                                 |

R—values are a measure of the fit quality. The following R-parameters are given: the profile R-value (R<sub>pr</sub>), the weighted profile R-value (R<sub>wp</sub>) and the expected profile R-value (R<sub>exp</sub>). The fit quality of djurleite is described by the Bragg R-value. GOF—the Goodness of Fit. F[000] is the calculated structure factor for the phase. The Cagliotti function, describing the variation of the full width at the half maximum (FWHM) of the peaks with 2Theta position, was refined with the parameters U, V and W.

**Table S2.** The occupancy, atomic fract. coordinates and biso for djurleite.

| Atom | Wyck. | S.O.F.   | x        | y        | z        | Biso/10 <sup>4</sup> pm <sup>2</sup> |
|------|-------|----------|----------|----------|----------|--------------------------------------|
| CU1  | 4e    | 1.000000 | 0.447800 | 0.129400 | 0.190100 | 1.341437                             |
| CU2  | 4e    | 1.000000 | 0.197700 | 0.001300 | 0.181100 | 2.340840                             |
| CU3  | 4e    | 1.000000 | 0.199100 | 0.249700 | 0.194300 | 1.552464                             |
| CU4  | 4e    | 1.000000 | 0.073800 | 0.366400 | 0.318900 | 2.026331                             |
| CU5  | 4e    | 1.000000 | 0.052700 | 0.114800 | 0.311200 | 2.000126                             |
| CU6  | 4e    | 1.000000 | 0.046100 | 0.622500 | 0.307200 | 2.526633                             |
| CU7  | 4e    | 1.000000 | 0.550000 | 0.346900 | 0.483700 | 1.656664                             |
| CU8  | 4e    | 1.000000 | 0.380000 | 0.609500 | 0.017100 | 1.787787                             |
| CU9  | 4e    | 1.000000 | 0.394600 | 0.365600 | 0.018300 | 2.420515                             |
| CU10 | 4e    | 1.000000 | 0.390700 | 0.123900 | 0.014900 | 1.578781                             |
| CU11 | 4e    | 1.000000 | 0.208000 | 0.710400 | 0.014400 | 1.526266                             |
| CU12 | 4e    | 1.000000 | 0.196800 | 0.535500 | 0.015900 | 2.026205                             |
| CU13 | 4e    | 1.000000 | 0.183900 | 0.260900 | 0.017400 | 3.184486                             |
| CU14 | 4e    | 1.000000 | 0.078900 | 0.395500 | 0.485800 | 2.579148                             |
| CU15 | 4e    | 1.000000 | 0.051500 | 0.111700 | 0.489500 | 3.548295                             |
| S1   | 4e    | 1.000000 | 0.385500 | 0.370900 | 0.311400 | 1.367990                             |
| S2   | 4e    | 1.000000 | 0.391800 | 0.116600 | 0.312800 | 1.105640                             |
| S3   | 4e    | 1.000000 | 0.603300 | 0.376700 | 0.183400 | 1.288322                             |
| S4   | 4e    | 1.000000 | 0.609000 | 0.130000 | 0.183800 | 1.340718                             |
| S5   | 4e    | 1.000000 | 0.631800 | 0.495600 | 0.311100 | 1.342155                             |
| S6   | 4e    | 1.000000 | 0.648600 | 0.243000 | 0.307200 | 1.209721                             |
| S7   | 4e    | 1.000000 | 0.349700 | 0.504900 | 0.187100 | 1.393832                             |
| S8   | 4e    | 1.000000 | 0.366000 | 0.252700 | 0.195000 | 1.236992                             |
| S9   | 4e    | 1.000000 | 0.105900 | 0.876100 | 0.182700 | 1.157799                             |
| S10  | 4e    | 1.000000 | 0.110400 | 0.622000 | 0.182200 | 1.894734                             |
| S11  | 4e    | 1.000000 | 0.110000 | 0.378400 | 0.190000 | 1.025965                             |
| S12  | 4e    | 1.000000 | 0.112000 | 0.122200 | 0.187500 | 1.078123                             |
| S13  | 4e    | 1.000000 | 0.140500 | 0.501100 | 0.314900 | 1.656908                             |
| S14  | 4e    | 1.000000 | 0.138900 | 0.239700 | 0.311800 | 1.129927                             |
| S15  | 4e    | 1.000000 | 0.143600 | 0.508000 | 0.806600 | 1.052044                             |
| S16  | 4e    | 1.000000 | 0.133100 | 0.747200 | 0.308500 | 1.447073                             |
| CU16 | 4e    | 1.000000 | 0.443100 | 0.000799 | 0.441100 | 2.051692                             |
| CU17 | 4e    | 1.000000 | 0.557000 | 0.244800 | 0.063000 | 2.051692                             |
| CU18 | 4e    | 1.000000 | 0.680700 | 0.371400 | 0.434100 | 1.761945                             |
| CU19 | 4e    | 1.000000 | 0.071500 | 0.010100 | 0.065900 | 2.394317                             |
| CU20 | 4e    | 1.000000 | 0.055900 | 0.757500 | 0.055800 | 1.814940                             |
| CU21 | 4e    | 1.000000 | 0.069100 | 0.491500 | 0.064300 | 2.210562                             |
| CU22 | 4e    | 1.000000 | 0.191900 | 0.387400 | 0.432600 | 1.683462                             |
| CU23 | 4e    | 1.000000 | 0.181700 | 0.140200 | 0.438400 | 2.447550                             |
| CU24 | 4e    | 1.000000 | 0.814100 | 0.384500 | 0.068300 | 1.446591                             |
| CU25 | 4e    | 1.000000 | 0.309500 | 0.500500 | 0.311600 | 1.789098                             |
| CU26 | 4e    | 1.000000 | 0.300500 | 0.246500 | 0.306900 | 1.921532                             |
| CU27 | 4e    | 1.000000 | 0.691400 | 0.254100 | 0.180600 | 4.787798                             |
| CU28 | 4e    | 1.000000 | 0.550200 | 0.374500 | 0.311300 | 2.342632                             |
| CU29 | 4e    | 1.000000 | 0.445100 | 0.378600 | 0.194600 | 2.341677                             |
| S17  | 4e    | 1.000000 | 0.158400 | 0.367400 | 0.069800 | 1.342747                             |
| S18  | 4e    | 1.000000 | 0.152300 | 0.136300 | 0.066900 | 1.210676                             |
| S19  | 4e    | 1.000000 | 0.105700 | 0.506800 | 0.443100 | 1.419083                             |
| S20  | 4e    | 1.000000 | 0.100500 | 0.264400 | 0.433900 | 1.130882                             |
| S21  | 4e    | 1.000000 | 0.102100 | 0.009600 | 0.435500 | 1.262598                             |
| S22  | 4e    | 1.000000 | 0.103500 | 0.752300 | 0.431700 | 1.103848                             |
| S23  | 4e    | 1.000000 | 0.362600 | 0.368600 | 0.435000 | 0.973087                             |
| S24  | 4e    | 1.000000 | 0.351500 | 0.125800 | 0.436600 | 1.184597                             |
| S25  | 4e    | 1.000000 | 0.638100 | 0.370300 | 0.061700 | 2.079683                             |
| S26  | 4e    | 1.000000 | 0.662900 | 0.124700 | 0.066000 | 1.053355                             |
| CU30 | 4e    | 1.000000 | 0.116100 | 0.640100 | 0.482900 | 2.183171                             |
| CU31 | 4e    | 1.000000 | 0.701400 | 0.033200 | 0.014800 | 1.472433                             |
| CU32 | 4e    | 1.000000 | 0.463500 | 0.417600 | 0.391800 | 1.419793                             |
| CU33 | 4e    | 1.000000 | 0.455700 | 0.157400 | 0.392700 | 1.789098                             |
| CU34 | 4e    | 1.000000 | 0.552800 | 0.089000 | 0.103500 | 1.446354                             |
| CU35 | 4e    | 1.000000 | 0.295400 | 0.465400 | 0.107700 | 2.289392                             |

|      |    |          |          |          |          |          |
|------|----|----------|----------|----------|----------|----------|
| CU36 | 4e | 1.000000 | 0.285700 | 0.233300 | 0.112500 | 5.210099 |
| CU37 | 4e | 1.000000 | 0.292800 | 0.042700 | 0.108700 | 2.077653 |
| CU38 | 4e | 1.000000 | 0.046600 | 0.341100 | 0.107700 | 1.499950 |
| CU39 | 4e | 1.000000 | 0.049600 | 0.167000 | 0.107600 | 2.577710 |
| CU40 | 4e | 1.000000 | 0.282800 | 0.492600 | 0.395400 | 1.815541 |
| CU41 | 4e | 1.000000 | 0.269800 | 0.249900 | 0.392600 | 1.946056 |
| CU42 | 4e | 1.000000 | 0.221100 | 0.028300 | 0.387100 | 3.393721 |
| CU43 | 4e | 1.000000 | 0.793300 | 0.225200 | 0.109500 | 1.947130 |
| CU44 | 4e | 1.000000 | 0.488800 | 0.000600 | 0.361000 | 1.893297 |
| CU45 | 4e | 1.000000 | 0.028200 | 0.496900 | 0.144500 | 2.447195 |
| CU46 | 4e | 1.000000 | 0.712500 | 0.402400 | 0.142800 | 5.472804 |
| CU47 | 4e | 1.000000 | 0.462000 | 0.211600 | 0.275900 | 2.104570 |
| CU48 | 4e | 1.000000 | 0.468900 | 0.037800 | 0.270200 | 1.973328 |
| CU49 | 4e | 1.000000 | 0.689300 | 0.361900 | 0.265600 | 4.761829 |
| CU50 | 4e | 1.000000 | 0.326400 | 0.609000 | 0.234200 | 4.973220 |
| CU51 | 4e | 1.000000 | 0.294500 | 0.411600 | 0.231100 | 2.157566 |
| CU52 | 4e | 1.000000 | 0.041500 | 0.459100 | 0.234000 | 2.079201 |
| CU53 | 4e | 1.000000 | 0.050800 | 0.285700 | 0.232200 | 1.921287 |
| CU54 | 4e | 1.000000 | 0.489100 | 0.267800 | 0.137400 | 5.868788 |
| CU55 | 4e | 1.000000 | 0.217000 | 0.830000 | 0.139000 | 3.024061 |
| CU56 | 4e | 1.000000 | 0.218700 | 0.633500 | 0.139800 | 6.183888 |
| CU57 | 4e | 1.000000 | 0.017400 | 0.494400 | 0.359300 | 2.025968 |
| CU58 | 4e | 1.000000 | 0.035400 | 0.744900 | 0.145500 | 2.341559 |
| S27  | 4e | 1.000000 | 0.390300 | 0.008900 | 0.064600 | 1.156961 |
| S28  | 4e | 1.000000 | 0.606400 | 0.243300 | 0.443000 | 1.051207 |
| S29  | 4e | 1.000000 | 0.384100 | 0.487300 | 0.058700 | 1.289870 |
| S30  | 4e | 1.000000 | 0.381600 | 0.244100 | 0.056300 | 1.183878 |
| S31  | 4e | 1.000000 | 0.148200 | 0.616700 | 0.562100 | 1.421230 |
| S32  | 4e | 1.000000 | 0.137700 | 0.627100 | 0.056900 | 0.868651 |
| CU59 | 4e | 1.000000 | 0.206000 | 0.091400 | 0.269400 | 2.893301 |
| CU60 | 4e | 1.000000 | 0.139200 | 0.865500 | 0.263300 | 3.341925 |
| CU61 | 4e | 1.000000 | 0.176600 | 0.646600 | 0.264400 | 5.396950 |
| CU62 | 4e | 1.000000 | 0.616900 | 0.238500 | 0.372300 | 4.765659 |

S.O.F—site occupancy factor. 1 means the position is 100% occupied; Biso— isotropic displacement parameter. The x, y and z are the atomic coordinates of a structure in units of the unit cell.

**Table S3.** Selected representative electron microprobe analyses of bornite from the Lubin mine, Poland. Crystal chemical formulae recalculated on basis of 4 S<sub>2</sub><sup>−</sup>.

| Compound  | an.1   | an.2   | an.3   | an.4  | an.5  | an.6   | an.7  | an.8   | an.9   | an.10 | an.11 | an.12 | an.13  | an.14  | an.15 | an.16  |
|-----------|--------|--------|--------|-------|-------|--------|-------|--------|--------|-------|-------|-------|--------|--------|-------|--------|
| Ag (at%)  | 0.44   | 0.50   | 0.50   | 0.42  | 0.49  | 0.47   | 0.46  | 0.43   | 0.43   | 0.45  | 0.58  | 0.38  | 0.43   | 0.42   | 0.47  | 0.38   |
| Fe        | 11.06  | 11.21  | 11.05  | 11.09 | 11.01 | 11.14  | 11.05 | 11.29  | 11.29  | 11.35 | 11.21 | 11.52 | 11.25  | 11.09  | 11.00 | 11.22  |
| Cu        | 63.66  | 63.00  | 63.36  | 62.84 | 62.89 | 63.53  | 62.99 | 63.04  | 63.04  | 62.87 | 62.67 | 63.01 | 63.30  | 63.38  | 63.39 | 63.33  |
| S         | 25.26  | 25.42  | 25.18  | 24.93 | 25.01 | 25.20  | 25.11 | 25.18  | 25.18  | 25.02 | 24.91 | 24.99 | 25.14  | 25.00  | 25.01 | 25.13  |
| TOTAL     | 100.47 | 100.16 | 100.11 | 99.44 | 99.45 | 100.38 | 99.64 | 100.05 | 100.05 | 99.78 | 99.45 | 99.99 | 100.24 | 100.07 | 99.99 | 100.21 |
| Ag (apfu) | 0.02   | 0.02   | 0.02   | 0.02  | 0.02  | 0.02   | 0.02  | 0.02   | 0.02   | 0.02  | 0.03  | 0.02  | 0.02   | 0.02   | 0.02  | 0.02   |
| Fe        | 1.01   | 1.01   | 1.01   | 1.02  | 1.01  | 1.02   | 1.01  | 1.03   | 1.03   | 1.04  | 1.03  | 1.06  | 1.03   | 1.02   | 1.01  | 1.03   |
| Cu        | 5.09   | 5.00   | 5.08   | 5.09  | 5.08  | 5.09   | 5.06  | 5.05   | 5.05   | 5.07  | 5.08  | 5.09  | 5.10   | 5.12   | 5.12  | 5.09   |
| S         | 4      | 4      | 4      | 4     | 4     | 4      | 4     | 4      | 4      | 4     | 4     | 4     | 4      | 4      | 4     | 4      |

b.d.l.—below detection limit; an—analyze no.
